# Supplementary material for: Optimal Duration of Antibiotics Therapy After Video-assisted Thoracoscopic Surgery in Thoracic Empyema and Complicated Parapneumonic Effusion
Source: Research Square preprint supplement (doi:10.21203/rs.3.rs-997272/v1), 2021-10-28
Supplement: Supplementary file 1 [file ba49c398b749deb3b81834e8.xlsx]

## Sheet: Sheet1
Table 1. Characterisitics of the patients
	n(%)	mean±SD	median (range)
Epidemiological deta
Gender
male	28(85)
female	5(15)
age (years)		62±11	63 (28-88)
Comorbidity	21 (64)
diabetes	9 (27)
cardiovascular	7 (21)
celebrovascular	3 (9)
mental disorder	6 (18)
cancer bearing	1 (3)
use of steroids	1 (3)
Ecog Performance Status
0-1	30 (91)
2	0
3	3 (9)
Laboraory examination
WBC (/μl)		16800±9,300	13200 (4800-50,000)
seg (%)		83.1±5.9	83.5 (70.4-94.4)
CRP (mg/dl)		20.4±9.8	18.8 (3.4-42.4)

## Sheet: Sheet3
Table 2. Post operative course
	n(%)	mean±SD	median (range)
major complication	4 (12%)
respiratory failure	3 (9%)
celebral indfarction	1 (3%)
hospital stay (day)		16.3±9.1	14 (7-51)
drainage duration (day)		7.4±7.2	6 (2-43)
antibiotics duration (day)		7.2±4.9	7 (1-18)
Failure of TE/PPE treatment	4 (12%)
recurrence	3 (9%)
progresion to chronic empyema	1 (3%)

## Sheet: Sheet4
Table 3. Pre/Post -operative antibiotics
	pre-operative	post-operative
	n (%)	n (%)
Carbapenem	18 (55)	15 (45)
MEPN	15	12
IPM/CS	1	1
DRPM	2	2
Penicillin	12 (36)	6 (18)
TAZ/PIPC	3	3
SBT/ABPC	9	3
Fluoloquinolon	2 (6)	9 (27)
PZFS	2	3
CPFX	-	2
LVFX p.o.	-	4
Cepharosporin	1 (3)	10 (30)
CFPM	1	1
CMZ	-	2
CEZ	-	5
CTRX	-	2
Lincomycin	7 (21)	3 (9)
CLDM	7	3
MEPN meropenem, IPM/CS imipenem/cilastatin, DRPM doripenem,
TAZ/PIPC tazobactam/piperacilin, SBT/ABPC sulbactam/ampicillin,
PZFS pazofloxacin, CPFX ciprofloxacin, LVFX p.o. Levofloxacin per os
CFPM cefepime, CMZ cefmetazole, CEZ cefazolin, CTRX ceftoriaxone
CLDM clindamycin

## Sheet: Sheet2
Table 4. Post-operative inflamatory parameters
	mean±SD	median (range)
Body temperature
<37.5ºC	4.5±4.4	3 (0-18)
<37.0ºC	7.4±7.5	6 (0-18)
White blood Cell
<10,000/μl	6.1±5.5	4 (1-22)
seg<80%	7.1±3.9	7 (0-17)
